# Supplementary material
Source: PubMed Central journal article supplement (PMC535369)

**A**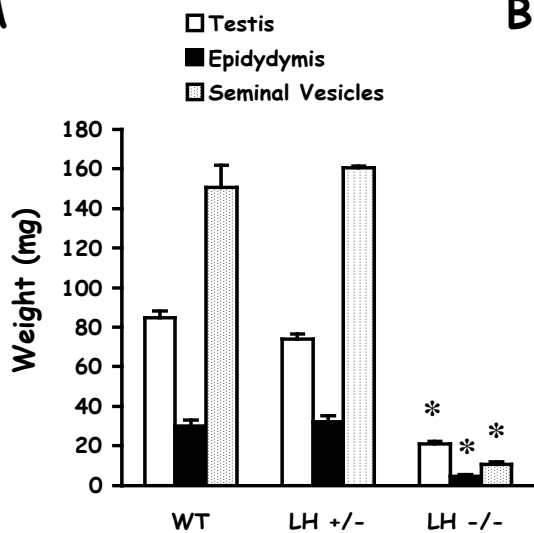**B**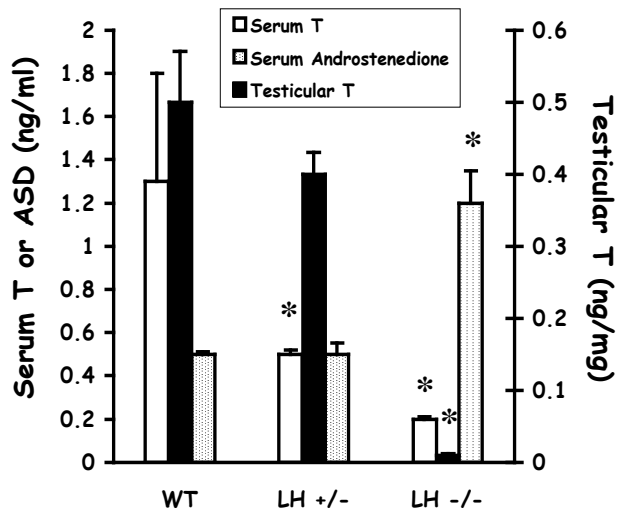**C**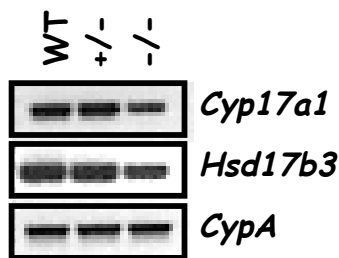**D**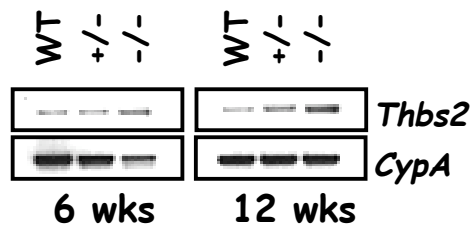**E**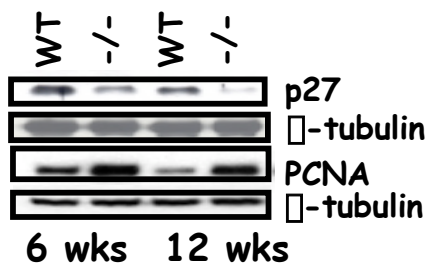

Supplement: pnas_101_49_17294__1.pdf [file pnas_101_49_17294__1.pdf]

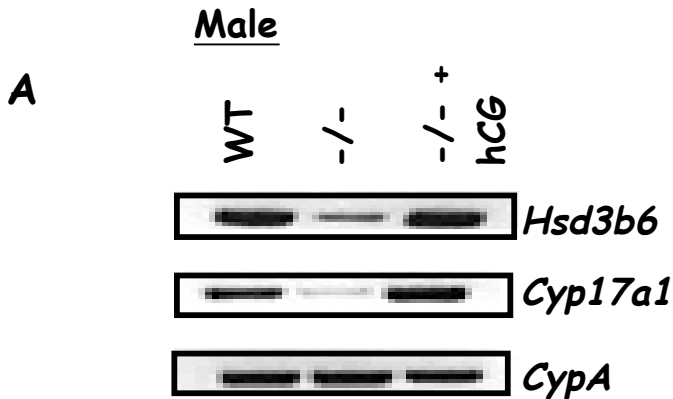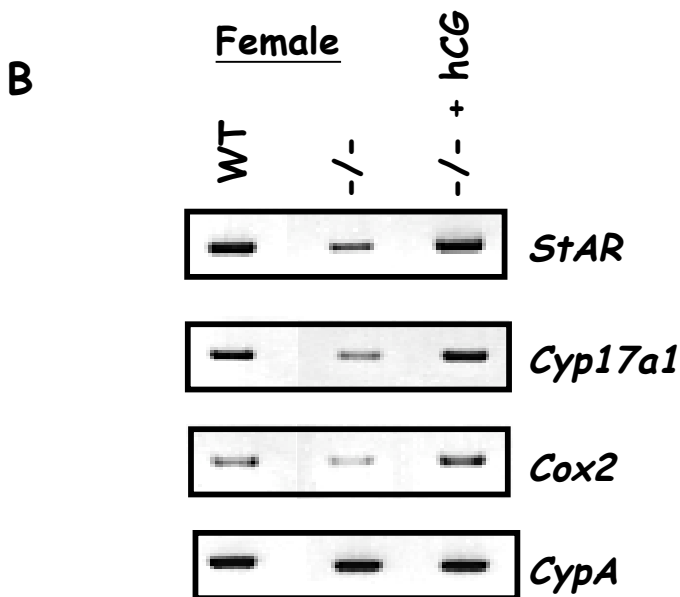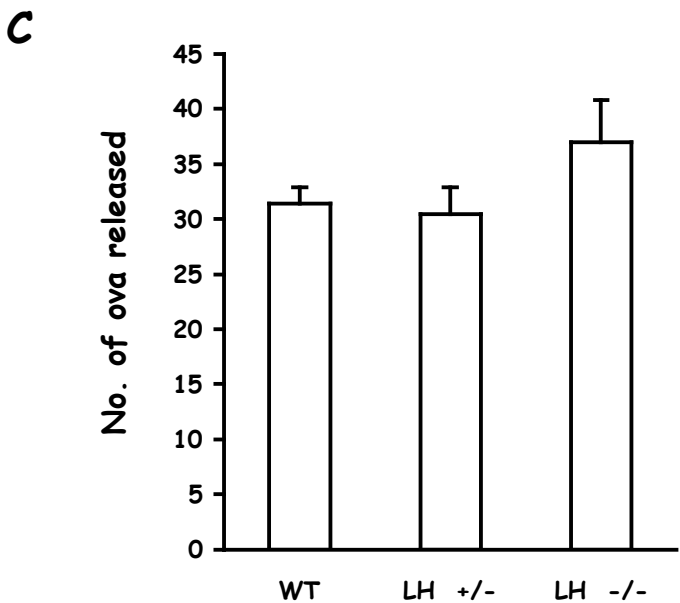

Supplement: pnas_101_49_17294__2.pdf [file pnas_101_49_17294__2.pdf]

+T

---

WT    -/-

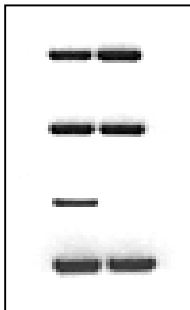

*Hsd3b1*

*Hsd3b6*

*Cy17a1*

*CypA*

Supplement: pnas_101_49_17294__3.pdf [file pnas_101_49_17294__3.pdf]

## Male

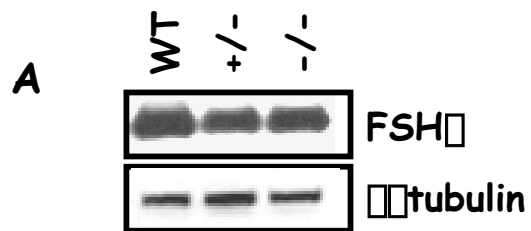

**B**

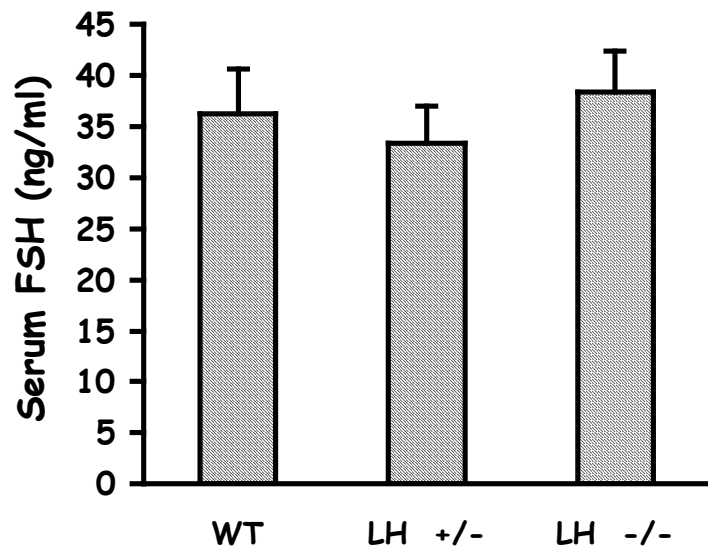

## Female

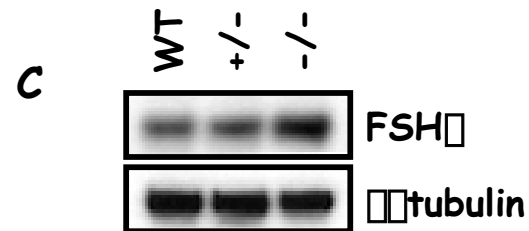

**D**

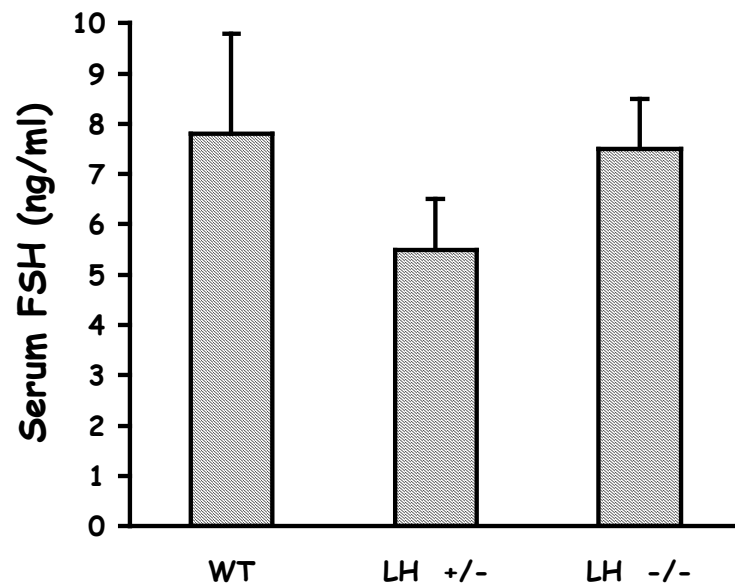

Supplement: pnas_101_49_17294__4.pdf [file pnas_101_49_17294__4.pdf]
